# Supplementary material for: A high-protein diet-responsive gut hormone regulates behavioural and metabolic optimization in Drosophila melanogaster
Source: Research Square preprint supplement (doi:10.21203/rs.3.rs-3884184/v1), 2024-02-15
Supplement: Supplementary file 1 [file a32e738e8fdc4afe0e115e3c.xlsx]

## Sheet: Sheet1
	Supplementary data. 1		Diet composition
	Figure. 2a-b	Glucose (g)	Yeast (g)	Cornmeal (g)	Agar (g)	Protein(g)	SUM	per 100mL water
	Normal diet	10	4	4	0.8		18.8
	Glucose diet	10			0.8		10.8
	4％ yeast-added diet	10	8	4	0.8		22.8
	Yeast only diet		4		0.8		4.8
	Peptone-supplemented diet	10	4	4	0.8	10	28.8
	Tryptone-supplemented diet	10	4	4	0.8	10	28.8
	Figure. 2c	Glucose (g)	Yeast (g)	Cornmeal (g)	Agar (g)	Protein(g)	SUM	per 100mL water
	Normal diet	10	4	4	0.8		18.8
	Peptone-supplemented diet	10	4	4	0.8	10	28.8
	10％ Glucose-supplemented diet	20	4	4	0.8		28.8
	Extended data Figure. 2a-c	Glucose (g)	Yeast (g)	Cornmeal (g)	Agar (g)	Protein(g)	SUM	per 100mL water
	2x Glucose diet	20	4	4	0.8		28.8
	Normal diet	10	4	4	0.8		18.8
	0.5x Glucose diet	5	4	4	0.8		13.8
	0.1x Glucose diet	1	4	4	0.8		9.8
	Extended data Figure. 2d-g	Glucose (g)	Yeast (g)	Cornmeal (g)	Agar (g)	Protein(g)	SUM	per 100mL water
	Normal diet	10	4	4	0.8		18.8
	10％ Glucose-supplemented diet	20	4	4	0.8		28.8
	Peptone-supplemented diet	10	4	4	0.8	10	28.8
