# Supplementary material for: A high-protein diet-responsive gut hormone regulates behavioural and metabolic optimization in Drosophila melanogaster
Source: Research Square preprint supplement (doi:10.21203/rs.3.rs-3884184/v1), 2024-02-15
Supplement: Supplementary file 2 [file cea67448fedbc61759c064c6.xlsx]

## Sheet: Sheet1
	Supplementary data. 2		Primer informations
CCHa1 forward	GAAGGCGGTCATAGATGCTAAAC
CCHa1 reverse	CTATTCGCATTCGTATTTCTGTTG
dilp2 forward	ACGAGGTGCTGAGTATGGTGTGC
dilp2 reverse	CACTTCGCAGCGGTTCCGATATCG
dilp3 forward	GTCCAGGCCACCATGAAGTTGTGC
dilp3 reverse	CTTTCCAGCAGGGAACGGTCTTCG
dilp5 forward	TGTTCGCCAAACGAGGCACCTTGG
dilp5 reverse	CACGATTTGCGGCAACAGGAGTCG
ImpL2 forward	AAGAGCCGTGGACCTGGTA
ImpL2 reverse	TTGGTGAACTTGAGCCAGTCG
Fit forward	CCAGGAATATTCGTTGGTCTGAGG
Fit reverse	GAATGAATGCCTCTGGGAAGTGAC
